# Supplementary material
Source: publisher figshare collection journal article supplement (https://gsajournals.figshare.com/ndownloader/files/23623259)
Supplement: Supplementary file 1 [file 23623259]

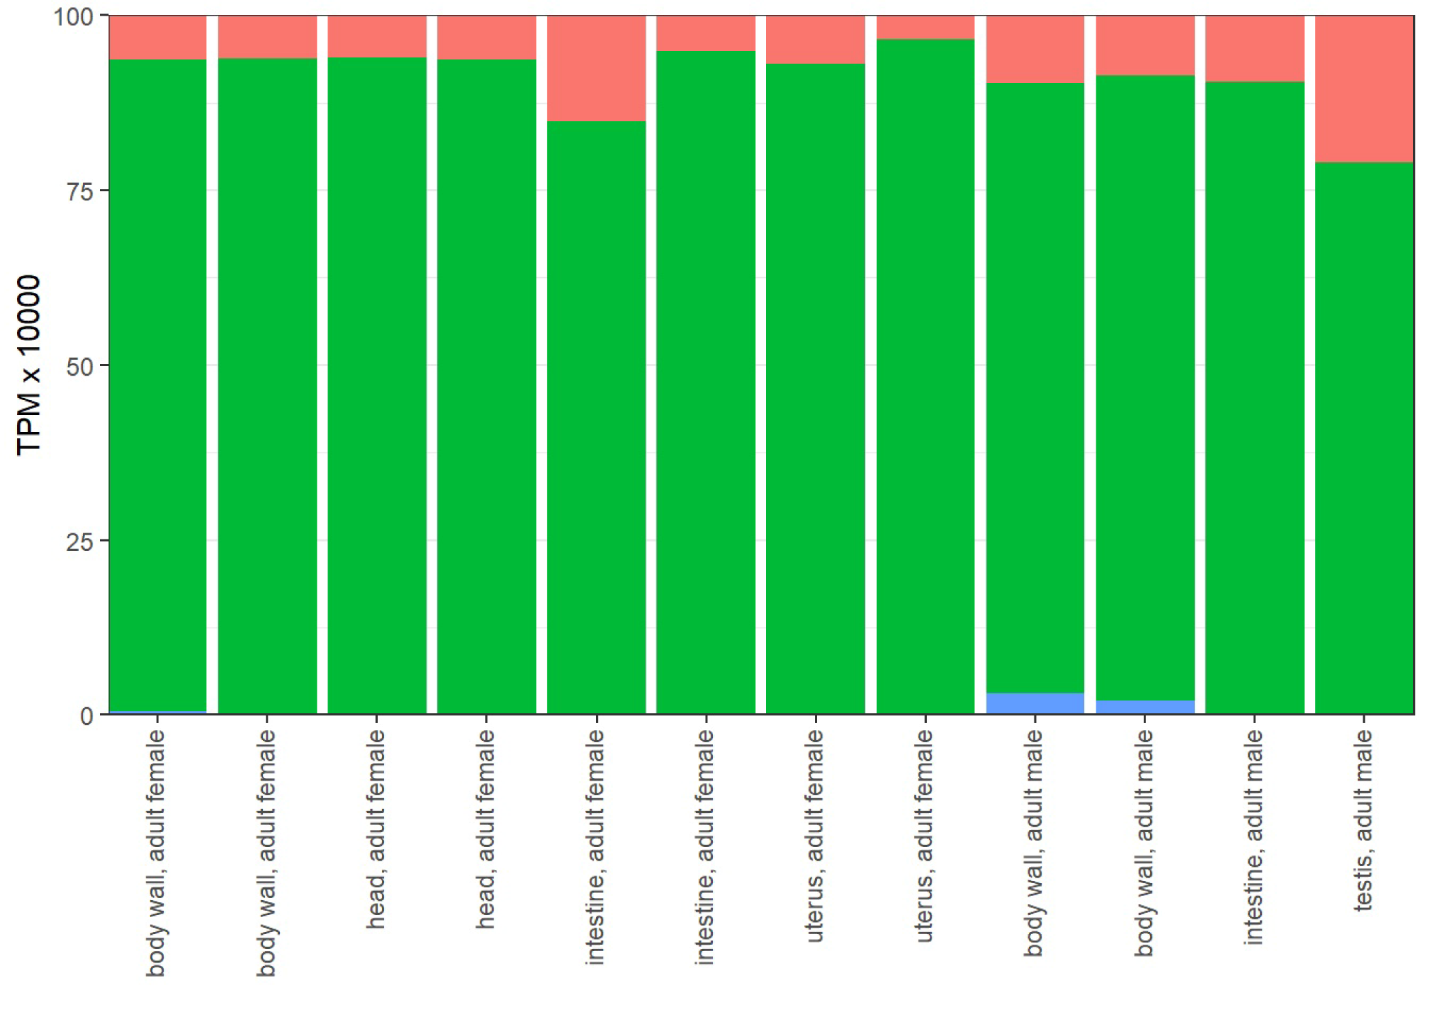


## Figure S1: TPM values for Luck et al., 2015 for different gene biotypes.

For each sample in the Luck et al., 2015 study, a stacked bar was generated to display the TPM values assigned to coding sequences (red), rRNAs (green), and the 6S RNA (blue).
